# Supplementary material for: Evaluation of Oseltamivir Used to Prevent Hospitalization in Outpatients With Influenza: A Systematic Review and Meta-Analysis
Source: PubMed Central journal article supplement (PMC10262060; doi:10.1001/jamainternmed.2023.0699), 2023-06-12
Supplement: jamainternmed-e230699-s001.pdf [file jamainternmed-e230699-s001.pdf]

1

## Supplemental Online Content

2 Hanula R, Bortolussi-Courval E, Mendel A, Ward BJ, Lee TC, McDonald EG.  
3 Evaluation of oseltamivir used to prevent hospitalization in outpatients with influenza: a  
4 systematic review and meta-analysis. *JAMA Intern Med*. Published online June 12, 2023.  
5 doi:10.1001/jamainternmed.2023.0699

6 **eTable 1.** Search strategies

7 **eFigure 1.** Visualization of the risk of bias

8 **eFigure 2.** Random effects subgroup analyses on the outcome of hospitalization

9 **eFigure 3.** Random effects remove-one sensitivity analysis on the outcome of  
10 hospitalization

11 **eFigure 4.** Random effects cumulative meta-analysis on the outcome of hospitalization

12 **eFigure 5.** Random effects sensitivity analysis on the outcome of hospitalization

13 **eTable 6.** Random effects sensitivity subgroup analyses on the outcome of  
14 hospitalization

15 **eFigure 7.** Publication bias funnel plot on the outcome of hospitalization

16 This supplemental material has been provided by the authors to give readers additional  
17 information about their work.

18

19 **Supplemental eTable 1. Search strategies**  
 20 **Ovid Medline**

| #  | Search                          | Results |
|----|---------------------------------|---------|
| 1  | Influenza A virus/              | 22175   |
| 2  | Influenza B virus/              | 4528    |
| 3  | Influenza*.mp.                  | 145690  |
| 4  | flu.mp.                         | 15249   |
| 5  | Influenza, Human/               | 54694   |
| 6  | 1 or 2 or 3 or 4 or 5           | 153306  |
| 7  | randomized controlled trial.pt. | 566020  |
| 8  | controlled clinical trial.pt.   | 94836   |
| 9  | random*.ab.                     | 1271612 |
| 10 | placebo.ab.                     | 227506  |
| 11 | trial.ab.                       | 596535  |
| 12 | groups.ab.                      | 2340038 |
| 13 | 7 or 8 or 9 or 10 or 11 or 12   | 3624063 |
| 14 | Exp animals/ not humans.sh.     | 4997861 |
| 15 | 13 not 14                       | 3114255 |
| 16 | Oseltamivir/                    | 3151    |
| 17 | Oseltamivir*.mp.                | 4908    |
| 18 | Tamiflu*.mp.                    | 518     |
| 19 | 16 or 17 or 18                  | 4986    |
| 20 | 6 and 15 and 19                 | 589     |

21  
 22 **Embase**

| # | Search                                     | Results |
|---|--------------------------------------------|---------|
| 1 | Influenza virus A/ or Influenza A virus/   | 24615   |
| 2 | Influenza virus B/ or Influenza B virus/   | 7198    |
| 3 | influenza B/ or influenza/ or influenza B/ | 84196   |
| 4 | influenza*.mp.                             | 223242  |

|    |                                                                                                                                                                                                               |         |
|----|---------------------------------------------------------------------------------------------------------------------------------------------------------------------------------------------------------------|---------|
| 5  | flu*.mp.                                                                                                                                                                                                      | 3178533 |
| 6  | 1 or 2 or 3 or 4 or 5                                                                                                                                                                                         | 3362888 |
| 7  | Randomized controlled trial/                                                                                                                                                                                  | 708162  |
| 8  | Controlled clinical trial/                                                                                                                                                                                    | 465854  |
| 9  | random*.ti,ab.                                                                                                                                                                                                | 1792299 |
| 10 | randomization/                                                                                                                                                                                                | 93918   |
| 11 | Intermethod comparison/                                                                                                                                                                                       | 282433  |
| 12 | placebo.ti,ab.                                                                                                                                                                                                | 344616  |
| 13 | (compare or compared or comparison).ti.                                                                                                                                                                       | 593655  |
| 14 | ((evaluated or evaluate or evaluating or assessed or assess) and (compare or compared or comparing or comparison)).ab.                                                                                        | 2491458 |
| 15 | (open adj label).ti,ab.                                                                                                                                                                                       | 96390   |
| 16 | ((double or single or doubly or singly) adj (blind or blinded or blindly)).ti,ab.                                                                                                                             | 261129  |
| 17 | double blind procedure/                                                                                                                                                                                       | 196834  |
| 18 | parallel group*1.ti,ab.                                                                                                                                                                                       | 29275   |
| 19 | (crossover or cross over).ti,ab.                                                                                                                                                                              | 117233  |
| 20 | ((assign\$ or match or matched or allocation) adj5 (alternate or group\$1 or intervention\$1 or subject\$1 or participant\$1)).ti,ab.                                                                         | 380014  |
| 21 | (assigned or allocated).ti,ab.                                                                                                                                                                                | 447816  |
| 22 | (controlled adj7 (study or design or trial)).ti,ab.                                                                                                                                                           | 409163  |
| 23 | (volunteer or volunteers).ti,ab.                                                                                                                                                                              | 273118  |
| 24 | human experiment/                                                                                                                                                                                             | 572817  |
| 25 | trial.ti.                                                                                                                                                                                                     | 364746  |
| 26 | or/7-25                                                                                                                                                                                                       | 5815599 |
| 27 | (random\$ adj sampl\$ adj7 (cross section\$ or questionnaire\$1 or survey\$ or database\$1)).ti,ab. Not (comparative study/ or controlled study/ or randomi?ed controlled.ti,ab. Or randomly assigned.ti,ab.) | 9055    |
| 28 | Cross-sectional study/ not (randomized controlled trial/ or controlled clinical study/ or controlled study/ or                                                                                                | 307281  |

|    |                                                                                                                                                                                                                                                    |         |
|----|----------------------------------------------------------------------------------------------------------------------------------------------------------------------------------------------------------------------------------------------------|---------|
|    | randomi?ed controlled.ti,ab. or control group\$1.ti,ab.)                                                                                                                                                                                           |         |
| 29 | ((((case adj control\$) and random\$) not randomi?ed controlled).ti,ab.                                                                                                                                                                            | 19729   |
| 30 | (Systematic review not (trial or study)).ti.                                                                                                                                                                                                       | 207099  |
| 31 | (nonrandom\$ not random\$).ti,ab.                                                                                                                                                                                                                  | 17850   |
| 32 | Random field\$.ti,ab.                                                                                                                                                                                                                              | 2691    |
| 33 | (random cluster adj# sampl\$).ti,ab.                                                                                                                                                                                                               | 1430    |
| 34 | (review.ab. and review.pt.) not trial.ti.                                                                                                                                                                                                          | 987121  |
| 35 | we searched.ab. And (review.ti. or review.pt.)                                                                                                                                                                                                     | 41495   |
| 36 | update review.ab.                                                                                                                                                                                                                                  | 122     |
| 37 | (databases adj4 searched).ab.                                                                                                                                                                                                                      | 50138   |
| 38 | (rat or rats or mouse or mice or swine or porcupine or murine or sheep or lambs or pigs or piglets or rabbit or rabbits or cat or cats or dog or dogs or cattle or bovine or monkey or monkeys or trout ot marmoset\$1).ti. and animal experiment/ | 1146778 |
| 39 | Animal experiment/ not (human experiment/ or human/)                                                                                                                                                                                               | 2410619 |
| 40 | or/27-29                                                                                                                                                                                                                                           | 3948480 |
| 41 | 26 not 40                                                                                                                                                                                                                                          | 5160620 |
| 42 | oseltamivir/                                                                                                                                                                                                                                       | 13392   |
| 43 | Oseltamivir*.mp.                                                                                                                                                                                                                                   | 14030   |
| 44 | tamiflu*.mp.                                                                                                                                                                                                                                       | 2317    |
| 45 | 42 or 43 or 44                                                                                                                                                                                                                                     | 14079   |
| 46 | 6 and 41 and 45                                                                                                                                                                                                                                    | 1121    |

23

24

### Cochrane CENTRAL

| # | Search                       | Results |
|---|------------------------------|---------|
| 1 | (Influenza A virus):ti,ab,kw | 3139    |
| 2 | (Influenza B virus):ti,ab,kw | 1282    |
| 3 | (Influenza*):ti,ab,kw        | 9988    |
| 4 | (flu*):ti,ab,kw              | 111122  |

|    |                                                    |         |
|----|----------------------------------------------------|---------|
| 5  | MeSH descriptor: [Influenza, Human] this term only | 2902    |
| 6  | (Influenza A*):ti,ab,kw                            | 8029    |
| 7  | (Influenza B*):ti,ab,kw                            | 7399    |
| 8  | 1 or 2 or 3 or 4 or 5 or 6 or 7                    | 119243  |
| 9  | (controlled clinical trial):pt                     | 331021  |
| 10 | (randomized controlled trial):pt                   | 545182  |
| 11 | (random*):ab                                       | 950488  |
| 12 | (placebo):ab                                       | 308565  |
| 13 | (trial):ab                                         | 504148  |
| 14 | (groups):ab                                        | 517708  |
| 15 | 9 or 10 or 11 or 12 or 13 or 14                    | 1265774 |
| 16 | MeSH descriptor: [Oseltamivir] this term only      | 252     |
| 17 | (oseltamivir*):ti,ab,kw                            | 577     |
| 18 | (tamiflu*):ti,ab,kw                                | 86      |
| 19 | 16 or 17 or 18                                     | 584     |
| 20 | 8 and 15 and 19                                    | 356     |

25

26

### PubMed

| # | Search                                                                                                                                                                                                                          | Results |
|---|---------------------------------------------------------------------------------------------------------------------------------------------------------------------------------------------------------------------------------|---------|
| 1 | (((((influenza a virus) OR (influenza b virus)) OR (influenza*)) OR (flu*)) OR (influenza a*)) OR (influenza b*))                                                                                                               | 153288  |
| 2 | (((((randomized controlled trial[Publication Type]) OR (controlled clinical trial[Publication Type])) OR (placebo[Title/Abstract])) OR (clinical trials as topic [MeSH Terms])) or (random*[Title/Abstract])) OR (trial[Title]) | 1804352 |
| 3 | (animals[MeSH Terms]) NOT (humans[MeSH Terms])                                                                                                                                                                                  | 4937458 |
| 4 | 2 not 3                                                                                                                                                                                                                         | 1659482 |
| 5 | ((oseltamivir[MeSH Terms]) OR (oseltamivir*)) OR (tamiflu*)                                                                                                                                                                     | 4942    |
| 6 | 1 and 4 and 5                                                                                                                                                                                                                   | 443     |

27

28 **Europe PMC**

| # | Search                                                                                                                                    | Results |
|---|-------------------------------------------------------------------------------------------------------------------------------------------|---------|
| 1 | ((((TS=(influenza*)) OR TS=(flu*)) OR TS=(influenza a virus)) OR TS=(influenza b virus))                                                  | 4110241 |
| 2 | (((((TS=(randomized controlled trial)) OR TS=(controlled clinical trial)) OR AB=(random*)) OR AB=(placebo)) OR AB=(trial)) OR AB=(groups) | 7021918 |
| 3 | ((TS=(oseltamivir)) OR TS=(tamiflu*)) or TS=(oseltamivir*)                                                                                | 5870    |
| 4 | 1 and 2 and 3                                                                                                                             | 1276    |

29

30 **Web of Science**

| # | Search                                                                                                                          | Results |
|---|---------------------------------------------------------------------------------------------------------------------------------|---------|
| 1 | TOPIC: (influenza a virus) OR TOPIC: (influenza b virus) OR TOPIC: (influenza*) OR TOPIC: (flu*)                                | 4115204 |
| 2 | TS=(controlled clinical trial) OR TS=(randomized controlled trial) OR AB=(random*) OR AB=(placebo) OR AB=(groups) OR AB=(trial) | 7035023 |
| 3 | TOPIC: (Oseltamivir*) OR TOPIC: (tamiflu*)                                                                                      | 5881    |
| 4 | 1 and 2 and 3                                                                                                                   | 1276    |

31

32 **Clinicaltrials.gov**

| # | Search                                                                                                                                            | Results |
|---|---------------------------------------------------------------------------------------------------------------------------------------------------|---------|
| 1 | Condition or disease: Influenza OR Influenza A OR Influenza B, Other terms: Oseltamivir OR Tamiflu<br>Study Type: Interventional (Clinical Trial) | 68      |

33

34 **World Health Organization International Clinical Trials Registry Platform**  
35 **(trialssearch.who.int)**

| # | Search                                 | Results |
|---|----------------------------------------|---------|
| 1 | influenza AND (oseltamivir OR tamiflu) | 188     |

36

37

|       |                             | Risk of bias domains |    |    |    |    |         |
|-------|-----------------------------|----------------------|----|----|----|----|---------|
|       |                             | D1                   | D2 | D3 | D4 | D5 | Overall |
| Study | Beigel 2020                 | +                    | +  | +  | +  | +  | +       |
|       | Hayden 2018                 | +                    | +  | +  | +  | +  | +       |
|       | Ison 2020                   | +                    | +  | +  | +  | +  | +       |
|       | Lin 2006                    | -                    | -  | +  | +  | +  | -       |
|       | Roberts 2014                | -                    | +  | +  | +  | +  | -       |
|       | Dorkings 1998               | +                    | +  | +  | +  | +  | +       |
|       | Dorkings 1999               | +                    | +  | -  | +  | +  | -       |
|       | McGarty 2000                | +                    | +  | X  | +  | +  | X       |
|       | Grosse 1999                 | -                    | +  | +  | +  | +  | -       |
|       | McCarvil 2000               | +                    | +  | +  | +  | +  | +       |
|       | WV15819 / WV15876 / WV15978 | +                    | +  | +  | +  | +  | +       |
|       | WV16277                     | +                    | +  | +  | +  | +  | +       |
|       | WV15730                     | +                    | +  | +  | +  | +  | +       |
|       | Fry 2014                    | +                    | +  | +  | +  | +  | +       |
|       | Butler 2020                 | -                    | +  | -  | +  | +  | -       |

Domains:  
D1: Bias arising from the randomization process.  
D2: Bias due to deviations from intended intervention.  
D3: Bias due to missing outcome data.  
D4: Bias in measurement of the outcome.  
D5: Bias in selection of the reported result.

Judgement  
 High  
 Some concerns  
 Low

38  
39 **Supplemental eFigure 1.** Visualization of the risk of bias. Determined using the Cochrane Risk  
40 of Bias Tool 2.0.

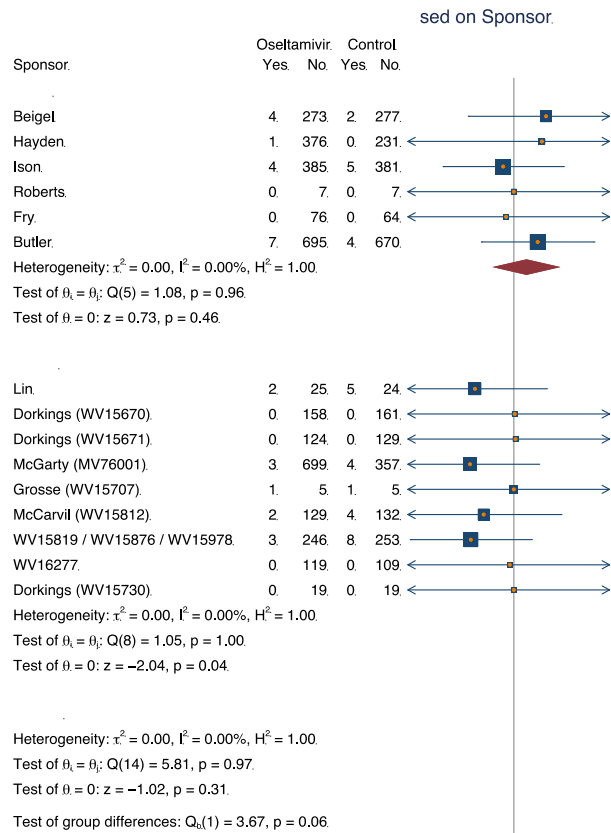

41 A)

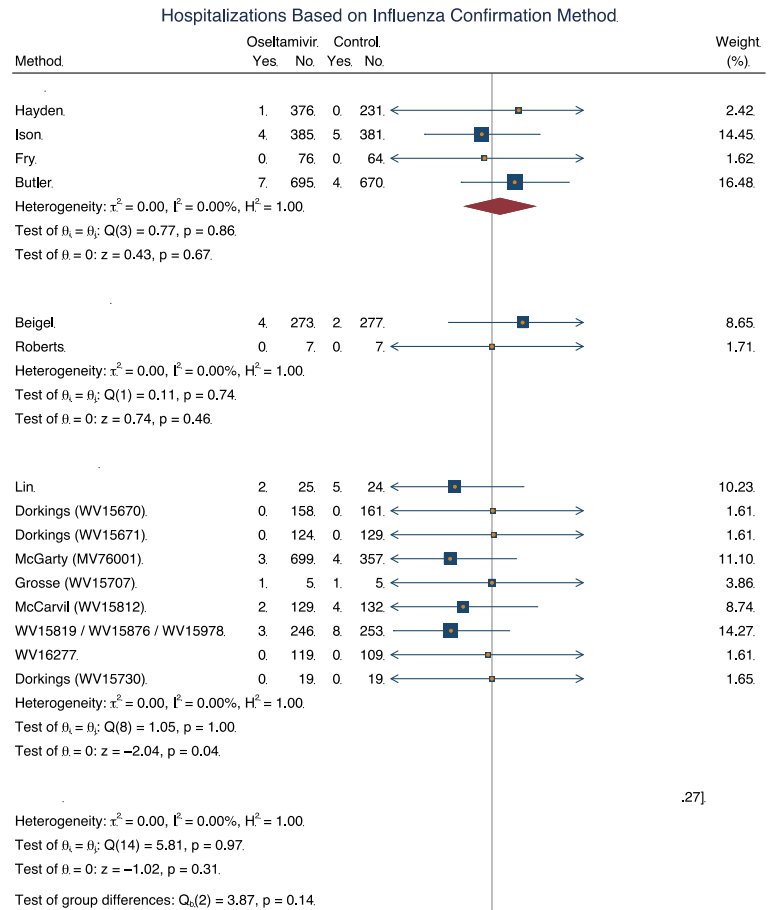

B)



analyses Based on Mean Population Age

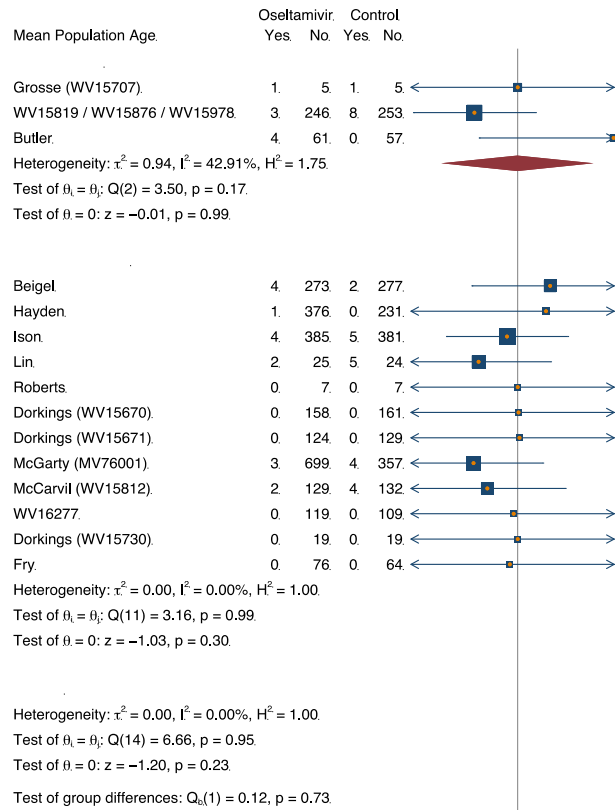

42 C)

analyses Based on Population Risk Level

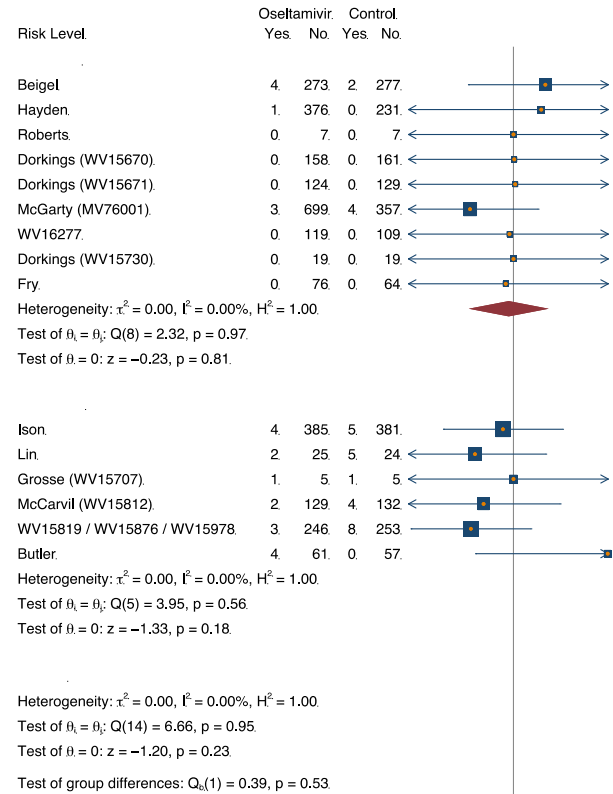

D)

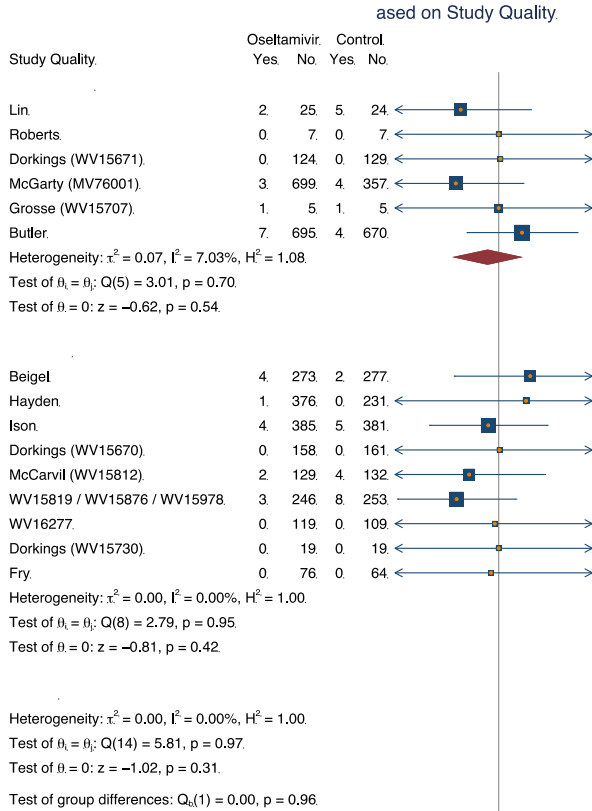

43 **E)**  
 44 **Supplemental eFigure 2.** Random effects subgroup analyses on the outcome of hospitalization.  
 45 Studies were stratified according to A) Study Sponsor, B) Method of Confirming Influenza  
 46 Infections, C) Mean Study Population Age, D) Population Risk Level, and E) Study Quality. Yes  
 47 = number of individuals hospitalized, No = number of individuals who were not. Note: Butler's  
 48 (2020) 12+ ITTi data provided via data request was used for the subgroup estimates in forest  
 49 plots A, B, and E. However, the supplemental 65+ ITTi data also provided was used for the  
 50 subgroup estimates in forest plots C and D.

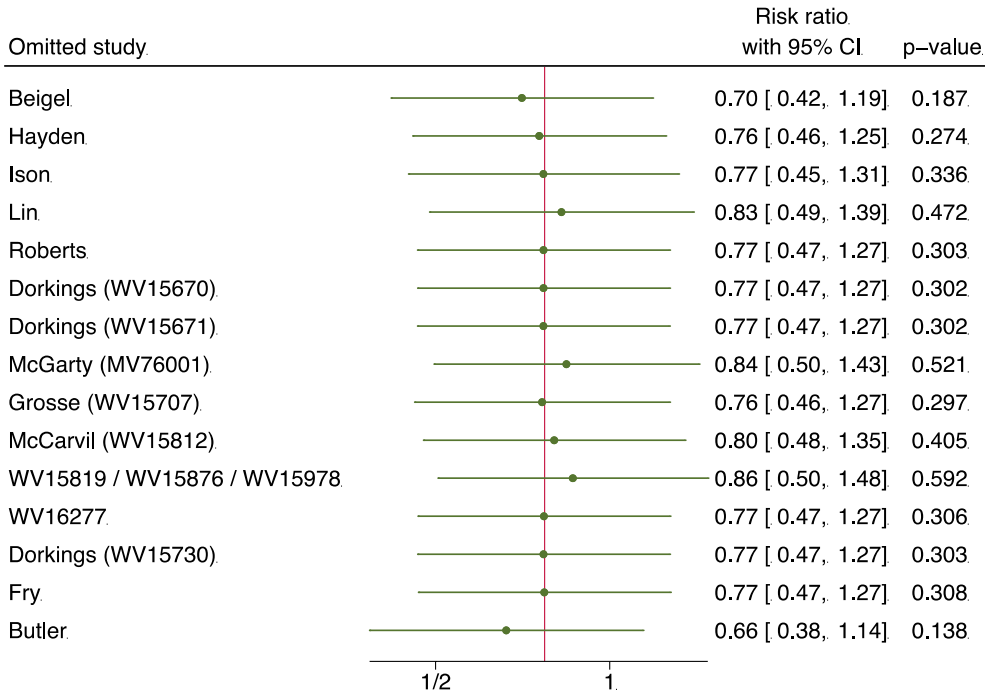

51  
52 **Supplemental eFigure 3.** Random effects remove-one sensitivity analysis on the outcome of  
53 hospitalization.  
54

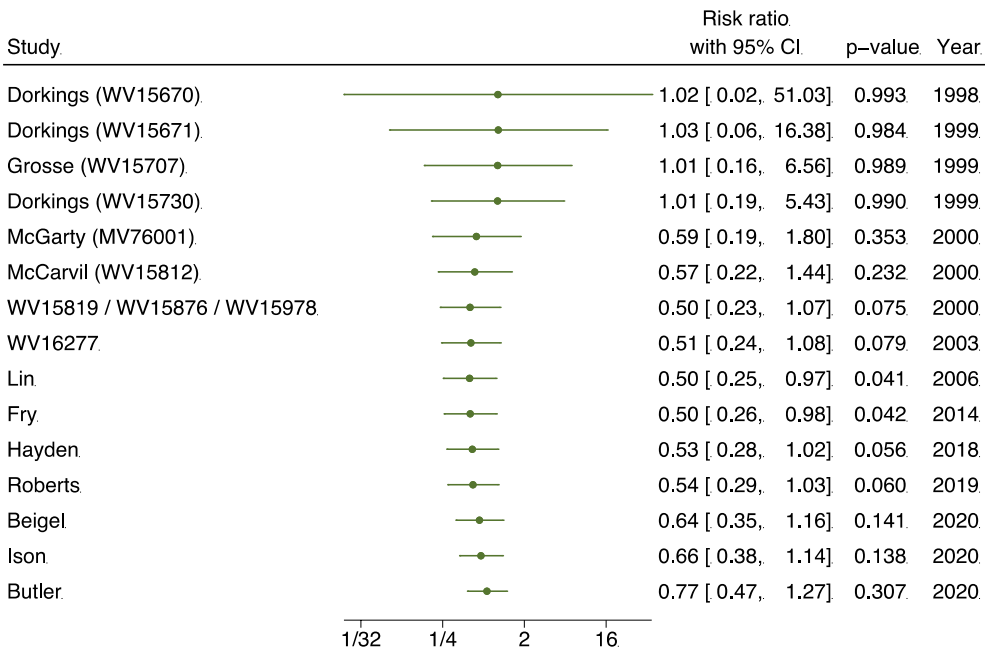

55  
56 **Supplemental eFigure 4.** Random effects cumulative meta-analysis on the outcome of  
57 hospitalization.

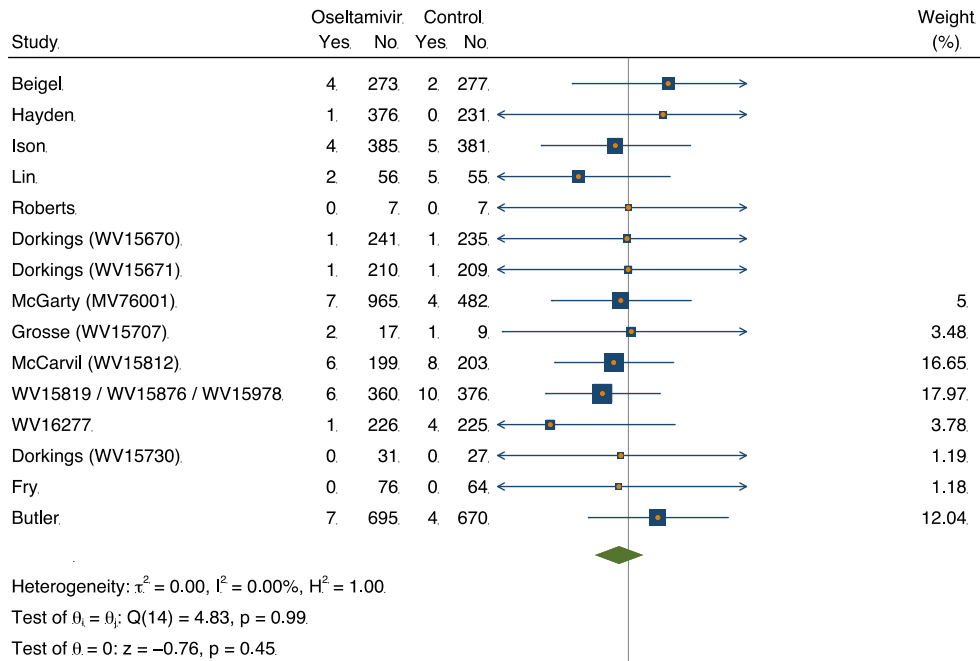

58  
 59 **Supplemental eFigure 5.** Random effects sensitivity analysis on the outcome of  
 60 hospitalization. Outcome data was based on the 12+ ITT populations for Roche-sponsored  
 61 studies and 12+ ITTi populations for non-industry studies. Yes = number of individuals  
 62 hospitalized, No = number of individuals who were not.

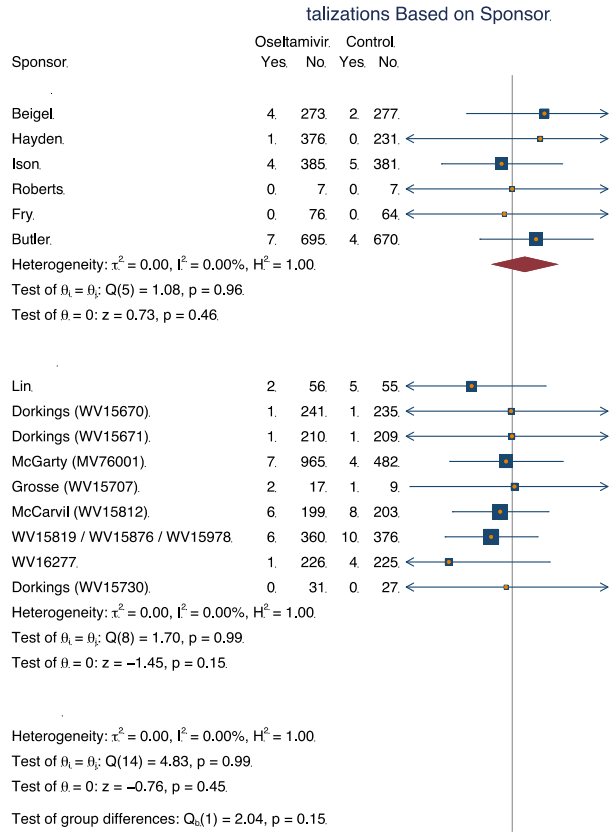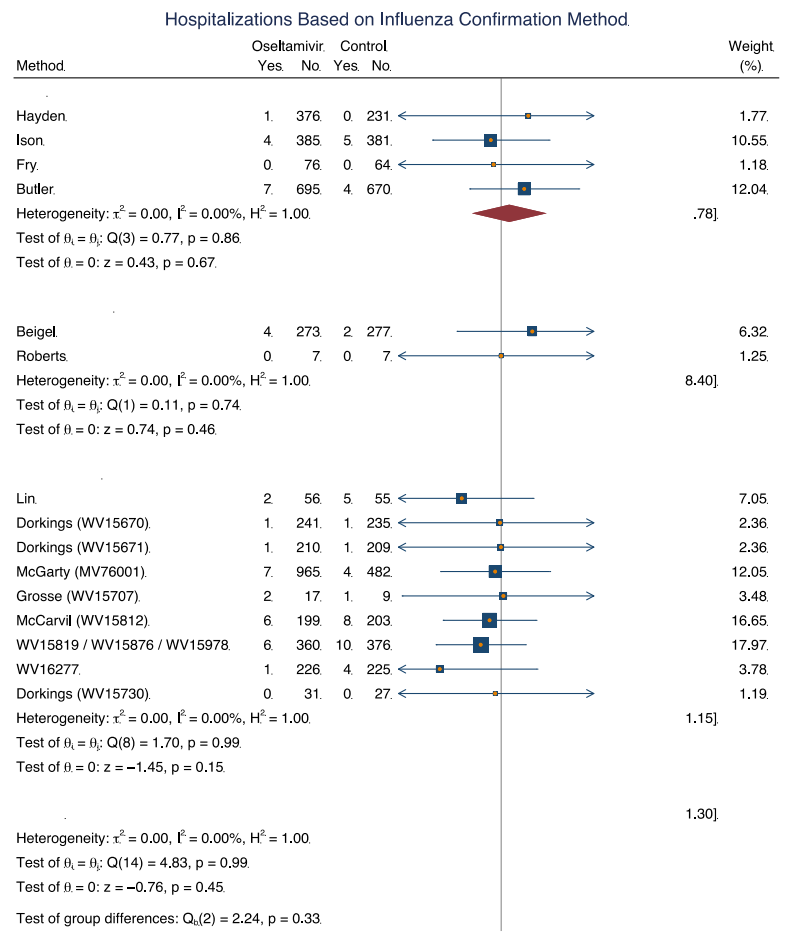

63 A)

B)

Hospitalizations Based on Mean Population Age

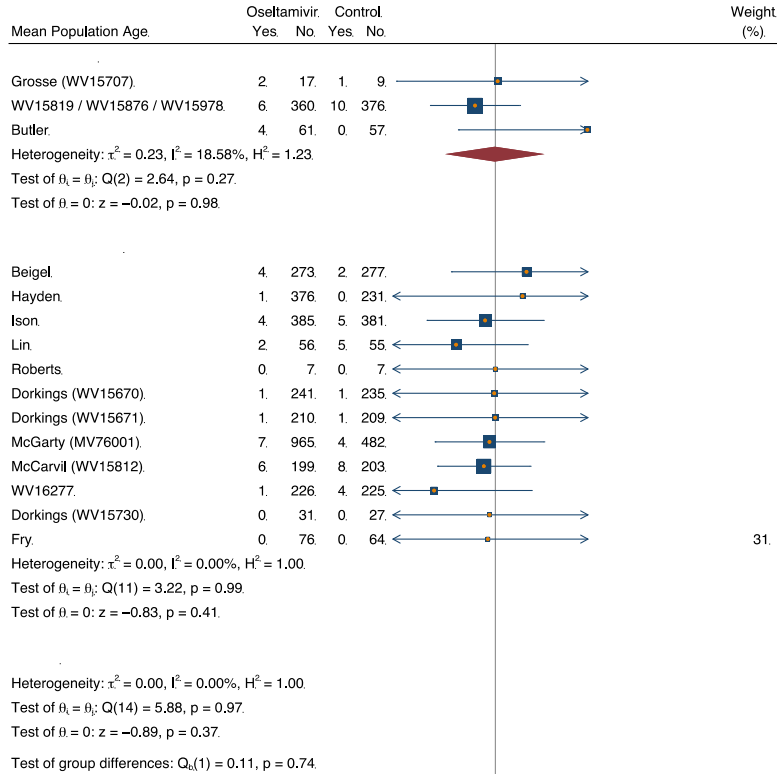

64 C)

Hospitalizations Based on Population Risk Level

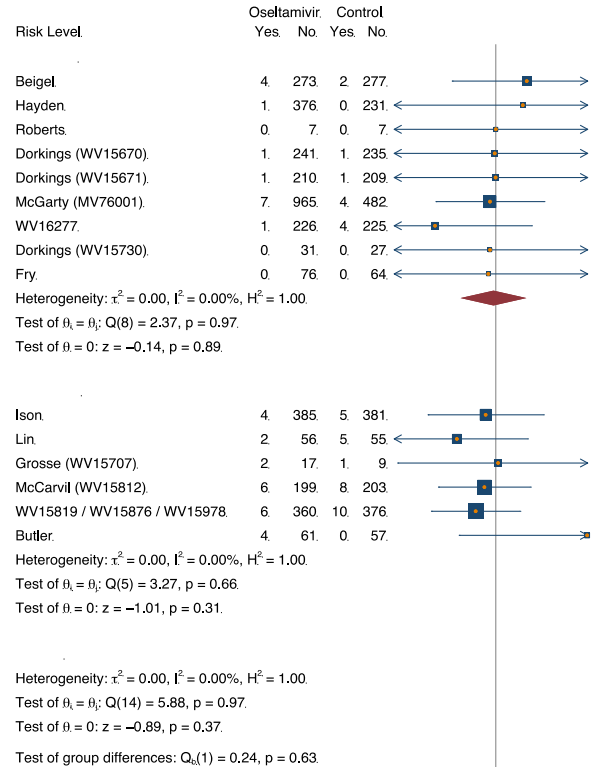

D)

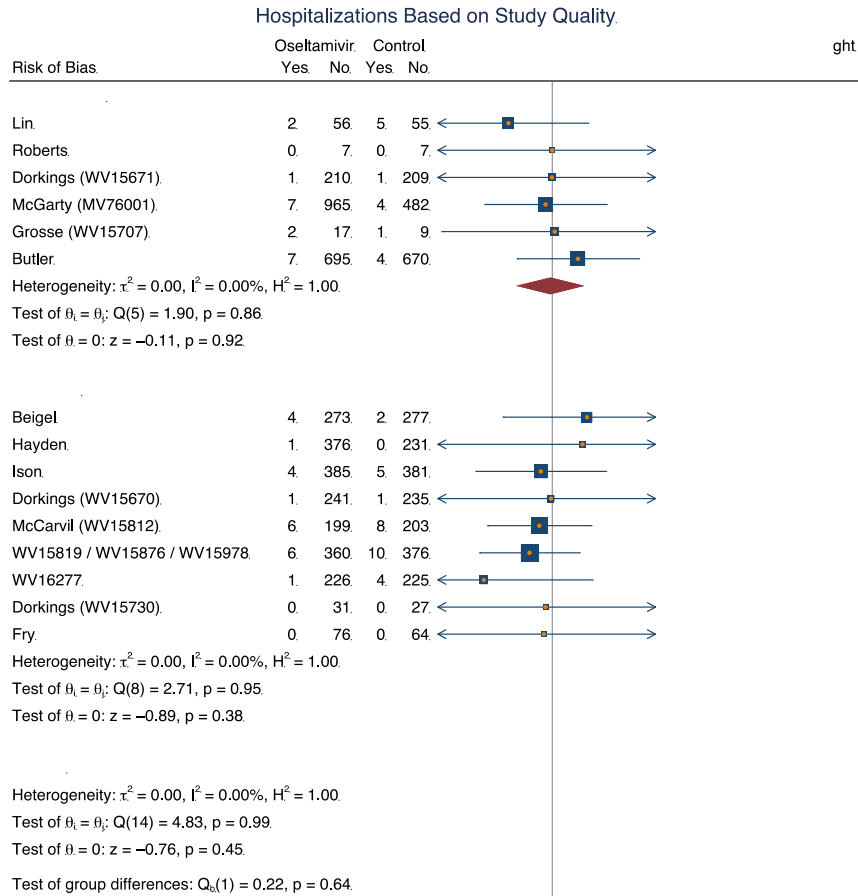

65 **E)**  
 66 **Supplemental eFigure 6.** Random effects sensitivity subgroup analyses on the outcome of  
 67 hospitalization. Outcome data was based on the ITT populations for Roche-sponsored studies  
 68 and ITTi populations for non-industry studies. Studies were stratified according to A) Study  
 69 Sponsor, B) Method of Confirming Influenza Infections, C) Mean Study Population Age, D)  
 70 Population Risk Level, and E) Study Quality. Yes = number of individuals hospitalized, No =  
 71 number of individuals who were not. Note: Butler's (2020) data was utilized the same as in  
 72 eFigure 2.

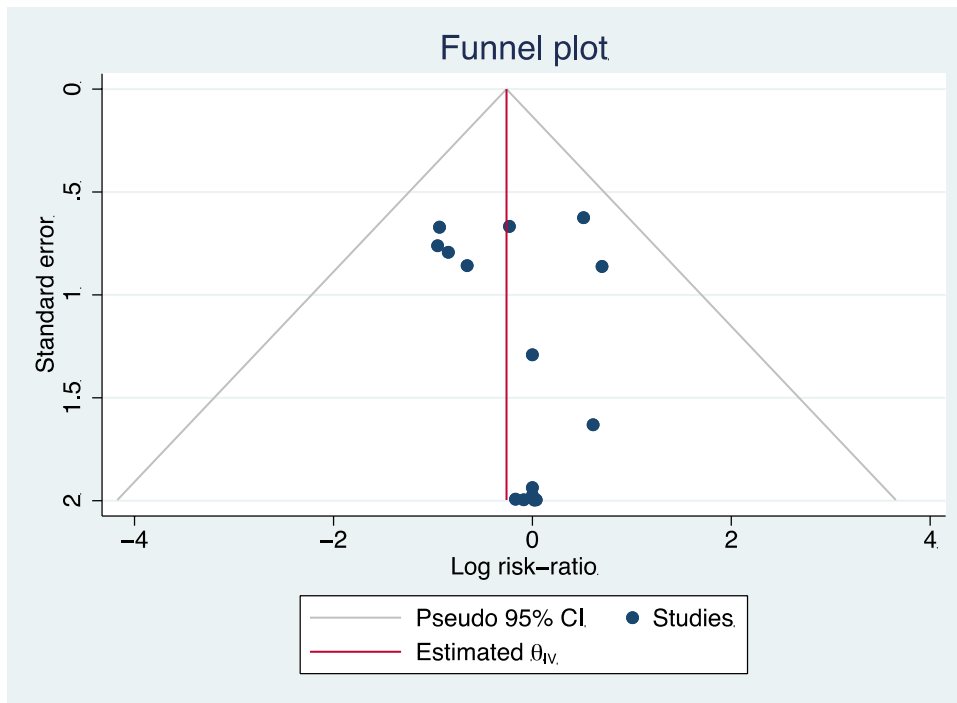

73  
74

**Supplemental eFigure 7.** Publication bias funnel plot on the outcome of hospitalization.
