# Supplementary material for: Evaluation of Oseltamivir Used to Prevent Hospitalization in Outpatients With Influenza: A Systematic Review and Meta-Analysis
Source: PubMed Central journal article supplement (PMC10262060; doi:10.1001/jamainternmed.2023.0699), 2023-06-12
Supplement: jamainternmed-e230699-s002.pdf [file jamainternmed-e230699-s002.pdf]

## Data Sharing Statement

Hanula. Evaluation of Oseltamivir Used to Prevent Hospitalization in Outpatients With Influenza. *JAMA Intern Med.* Published June 12, 2023. doi:10.1001/jamainternmed.2023.0699

### Data

**Data available:** Yes

**Data types:** Other (please specify)

**Additional Information:** Collected outcome and demographic data from each of the included studies within our meta-analysis

**How to access data:** [ryan.hanula@mail.mcgill.ca](mailto:ryan.hanula@mail.mcgill.ca)

**When available:** With publication

### Supporting Documents

**Document types:** None

### Additional Information

**Who can access the data:** Anyone requesting the data

**Types of analyses:** For any purpose

**Mechanisms of data availability:** With investigator support
